# Supplementary material for: Fluorine-selective post-plasma chemical ionization for enhanced elemental detection of fluorochemicals
Source: Royal Society of Chemistry journal article supplement (doi:10.1039/d2ja00430e), 2023-01-01
Supplement: d2ja00430e1.pdf [file d2ja00430e1.pdf]

## Electronic Supplementary Information

### Fluorine-Selective Post-Plasma Chemical Ionization for Enhanced Elemental Detection of Fluorochemicals

Jordan L. Tanen, Samuel R. White, Duong Ha, and Kaveh Jorabchi\*

Department of Chemistry, Georgetown University, Washington, DC 20057

\*Corresponding author: kj256@georgetown.edu

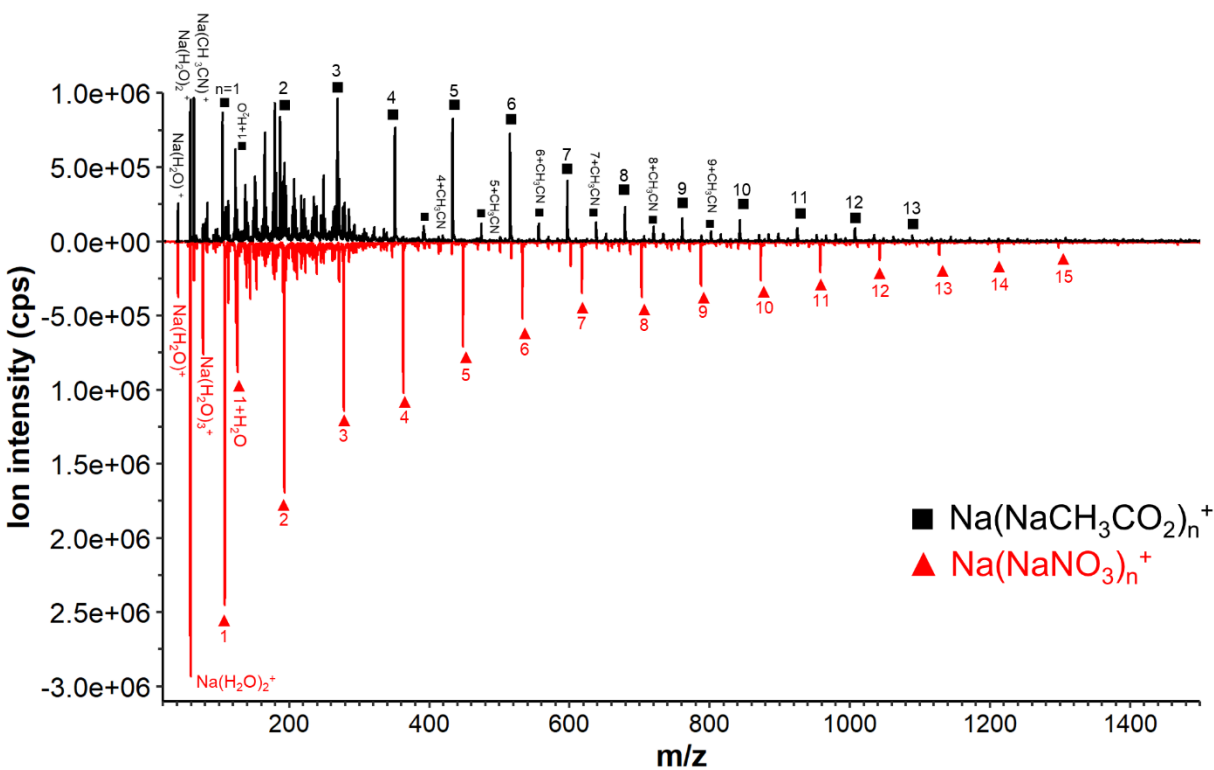

**Figure S1.** (Black) Nanospray of 10 mM  $\text{NaCH}_3\text{CO}_2$  with the interface flushed using air (5.6 L/min) to block plasma sampling into the first chamber. (Red) Inverted spectrum from the same nanospray with the air flow into the interface lowered to 2.6 L/min to sample the plasma.  $\text{O}_2$  flow rate into the plasma was set to 50 mL/min and background scans were acquired with a scan time of 3 seconds for both spectra.

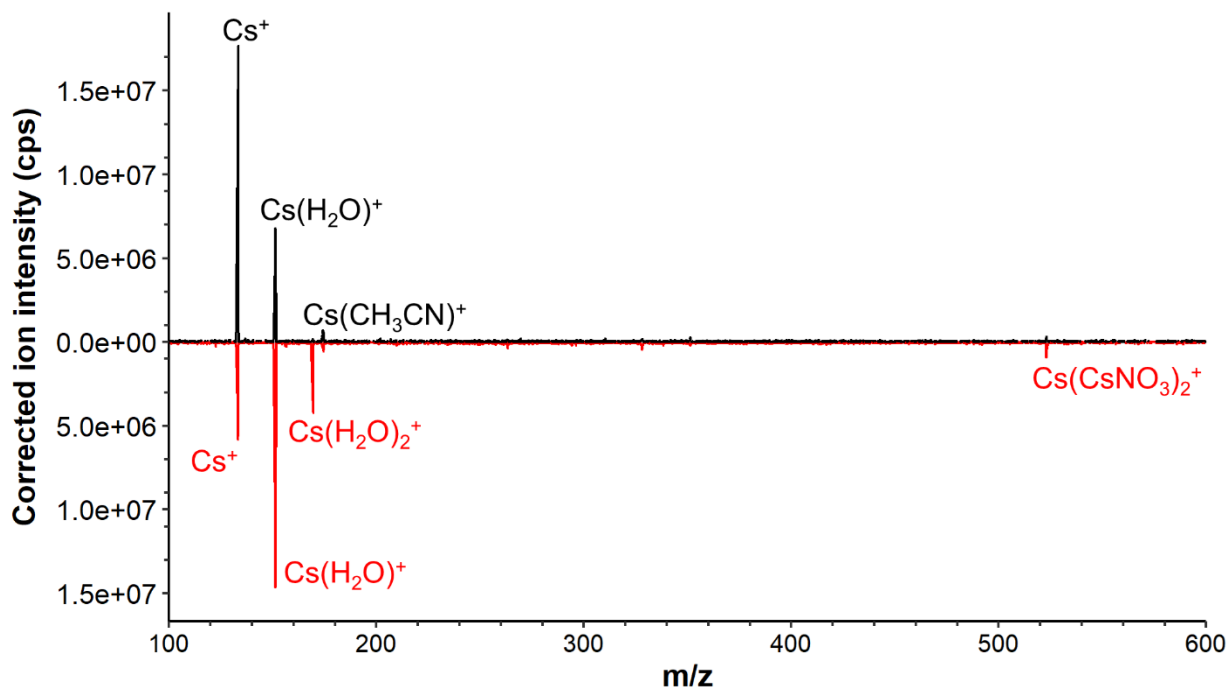

**Figure S2.** (Black) Nanospray of 100  $\mu\text{M}$   $\text{CsNO}_3$  with the interface flushed using air (5.6 L/min) to block plasma sampling into the first chamber. (Red) Inverted spectrum from the same nanospray with the air flow into the interface lowered to 2.6 L/min to sample the plasma.  $\text{O}_2$  flow rate into the plasma was set to 50 mL/min and background scans were acquired with a scan time of 3 seconds for both spectra.

The total intensity of all cesium-containing ions without plasma sampling (observed at air flow rate of 5.6 L/min) is  $1.4 \times 10^8 \pm 7 \times 10^6$  cps compared to the total intensity of  $1.4 \times 10^8 \pm 1 \times 10^7$  cps with plasma sampling (observed at air flow rate of 2.6 L/min). The absence of a reduction in total ion intensity suggests that neutralization of nanospray ions does not occur upon plasma sampling and that the presence of negative ions is negligible.
